# Supplementary material for: Oxygen defect engineering endows Co3O4 nanosheets with advanced aluminum ion storage
Source: Royal Society of Chemistry journal article supplement (doi:10.1039/d2ta04165k), 2022-01-01
Supplement: d2ta04165k1.pdf [file d2ta04165k1.pdf]

## Oxygen Defects Engineering Endows $\text{Co}_3\text{O}_4$ Nanosheets with Advanced Aluminum Ions Storage

Jiening Zheng,<sup>†a</sup> Tian Xu,<sup>†a</sup> Guanglin Xia,<sup>a</sup> and Xuebin Yu<sup>\*a</sup>

<sup>a</sup>Department of Materials Science, Fudan University, Shanghai 200433, China.

\* **Corresponding author:** yuxuebin@fudan.edu.cn (Xuebin Yu)

† Jiening Zheng and Tian Xu contributed equally to this work

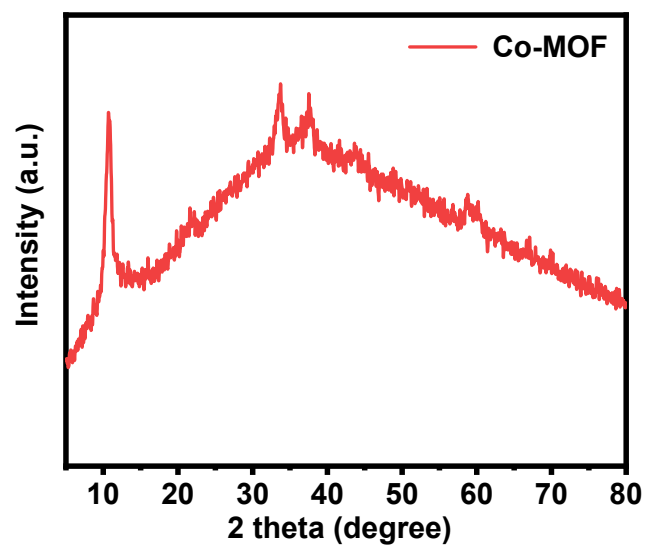

Figure S1. The XRD pattern of Co-MOF.

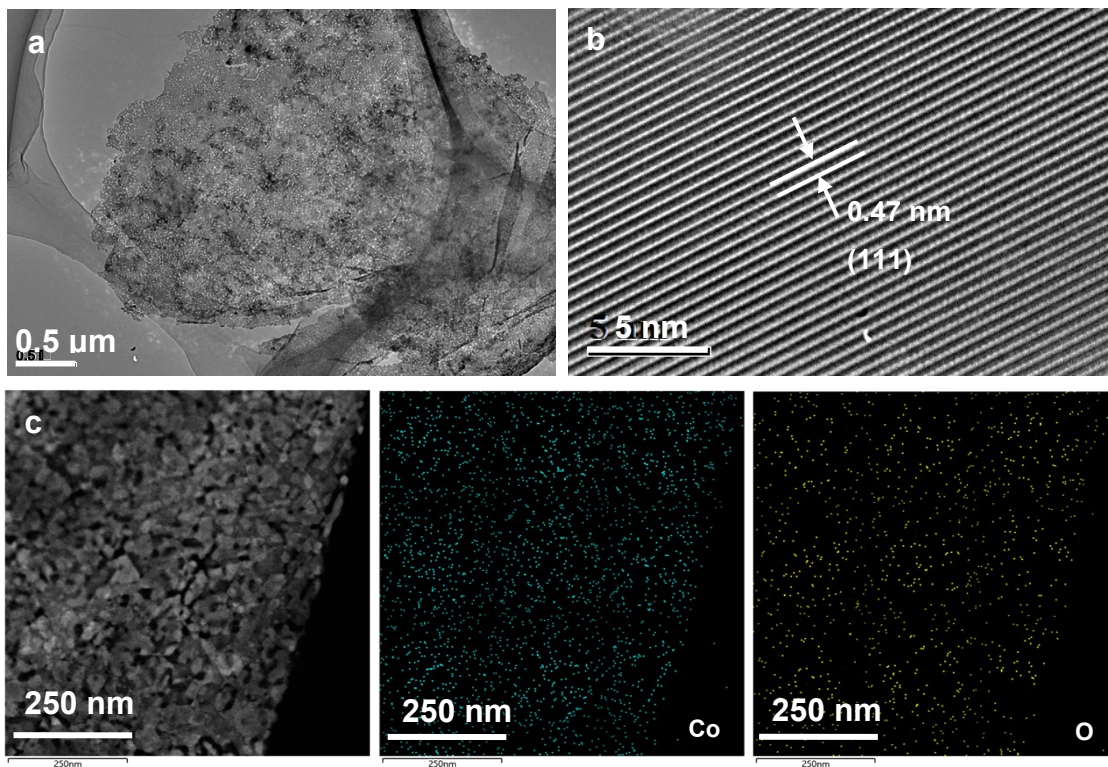

Figure S2. (a) TEM, and (b) HRTEM images of  $\text{Co}_3\text{O}_4$ . (c) Elemental mapping images of  $\text{Co}_3\text{O}_4$ .

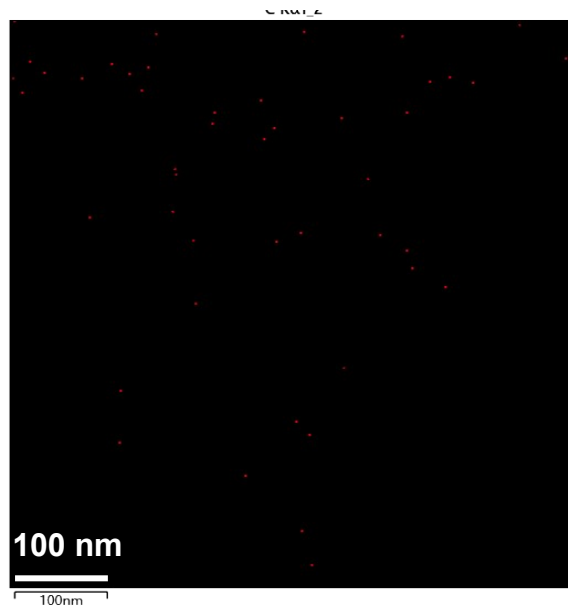

Figure S3. EDX elemental mapping image of carbon in  $\text{Co}_3\text{O}_{4-x}$ .

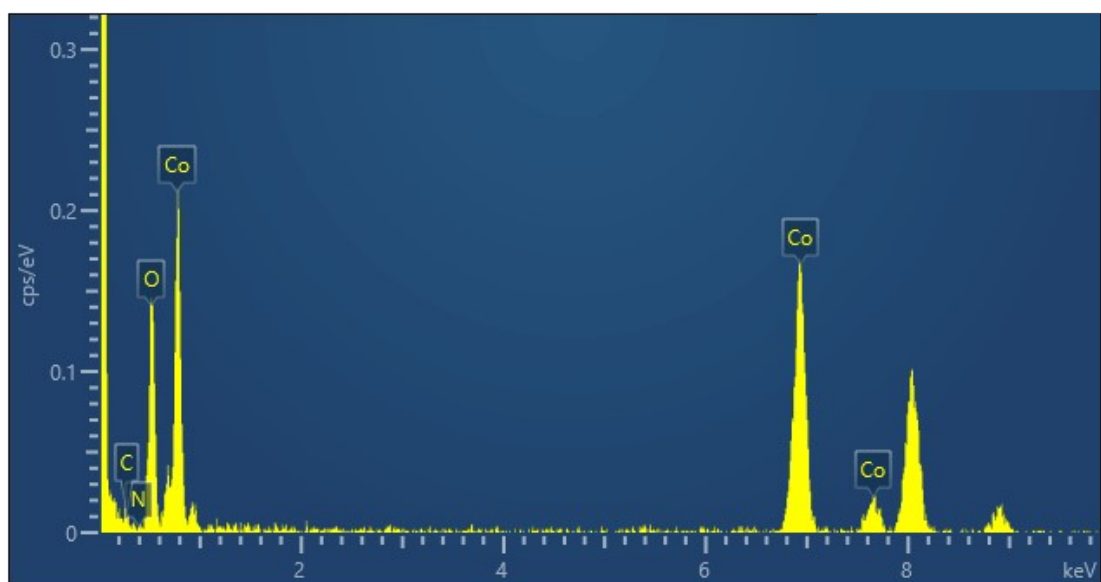

Figure S4. The EDS pattern of  $\text{Co}_3\text{O}_{4-x}$ .

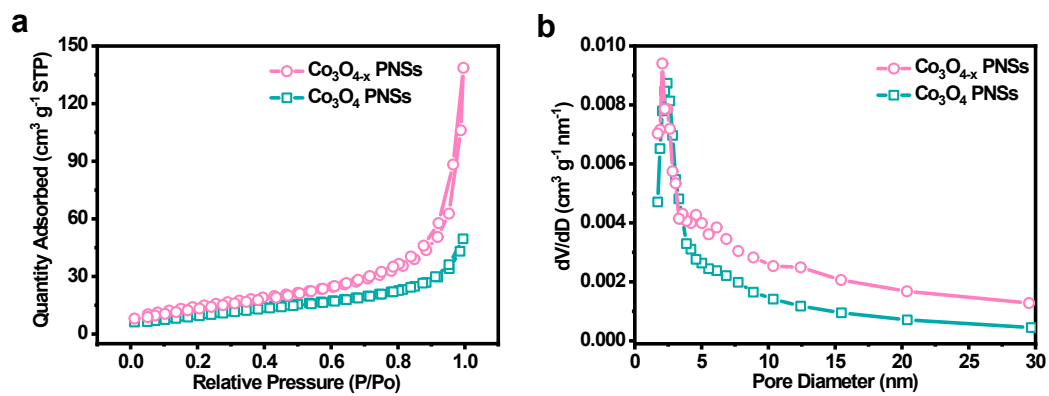

Figure S5. (a)  $\text{N}_2$  adsorption–desorption isotherm and (b) the pore size distribution curve of the  $\text{Co}_3\text{O}_{4-x}$  and  $\text{Co}_3\text{O}_4$  porous nanosheets.

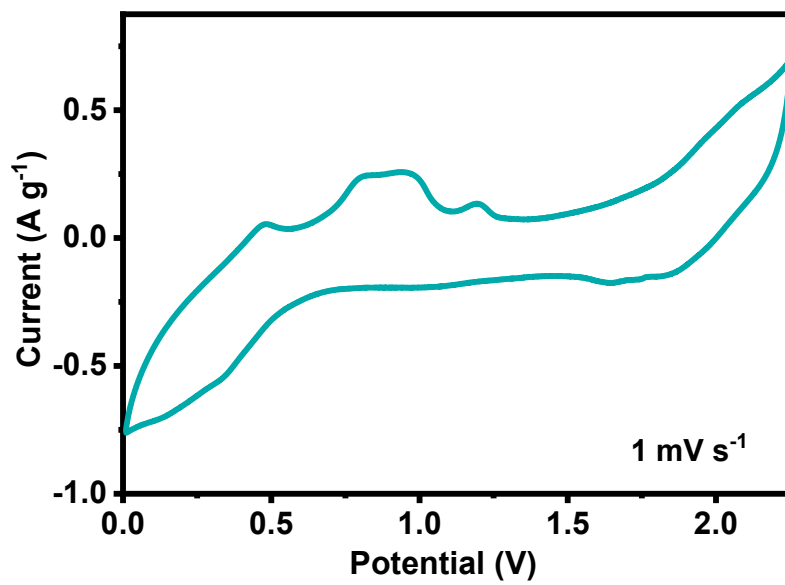

Figure S6. CV curve of Co<sub>3</sub>O<sub>4</sub> obtained at a scanning rate of 1.0 mV s<sup>-1</sup>

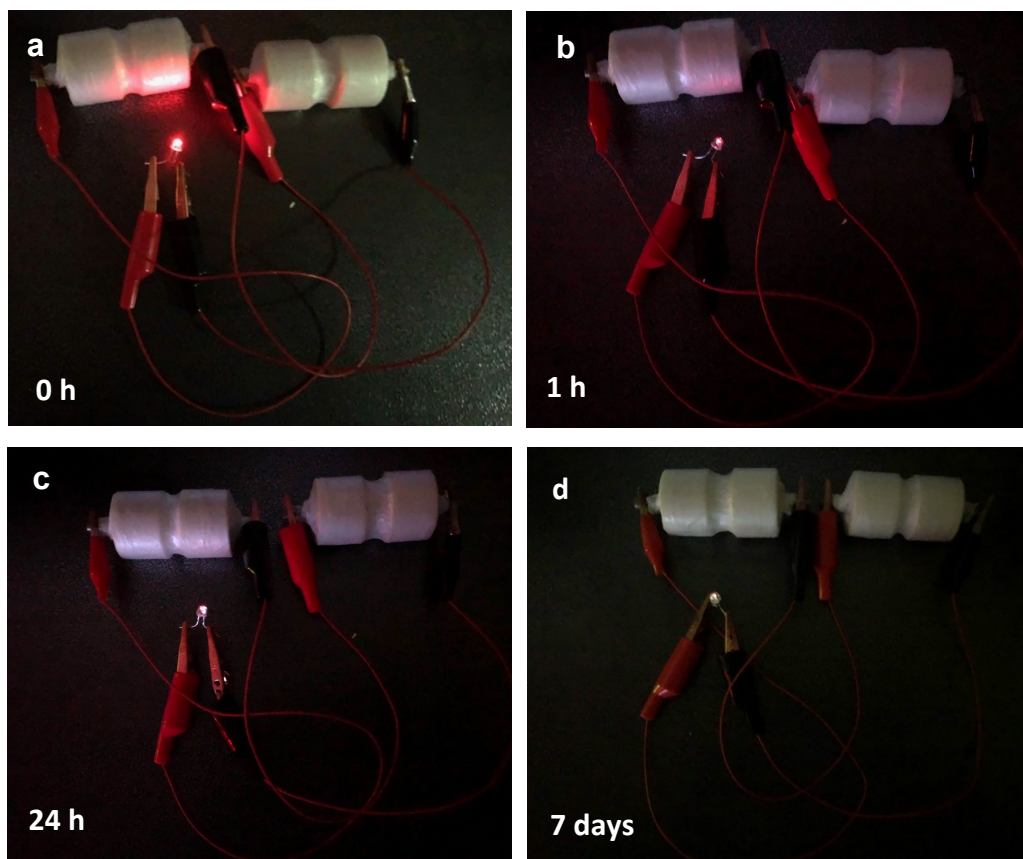

Figure S7. (a-d) The 3 V LED lamp lighted by two serially-connected  $\text{Co}_3\text{O}_{4-x}/\text{Al}$ .

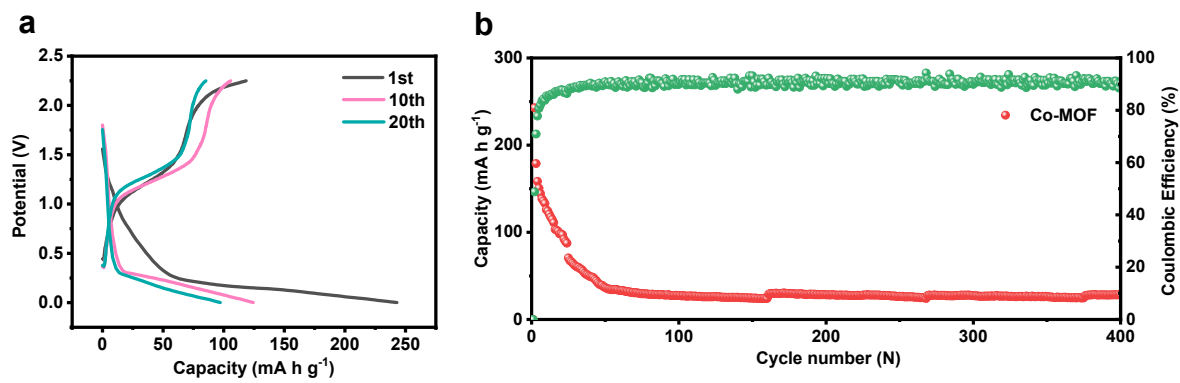

Figure S8. (a) The selected galvanostatic discharge–charge profiles and (b) cycling performance of the Co-MOF precursor at 1000 mA g<sup>-1</sup>.



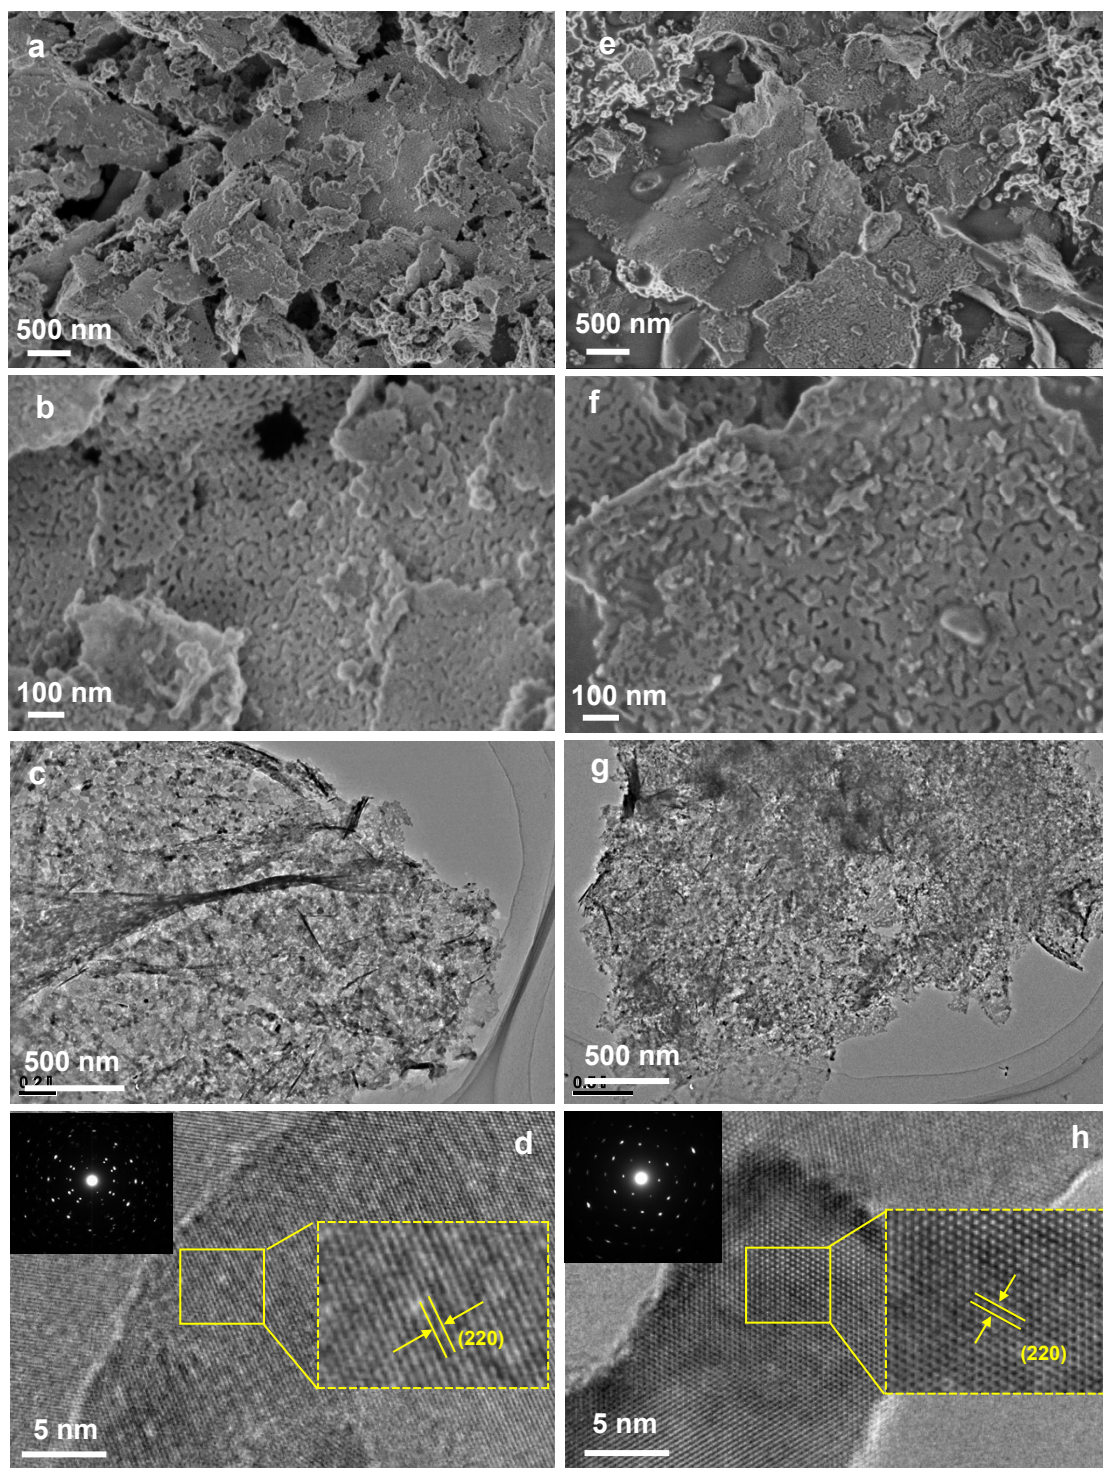

Figure S9. SEM, TEM, HRTEM, and SAED images of (a-d) discharged state and (e-h) charged state of  $\text{Co}_3\text{O}_{4-x}$  in the initial cycle.

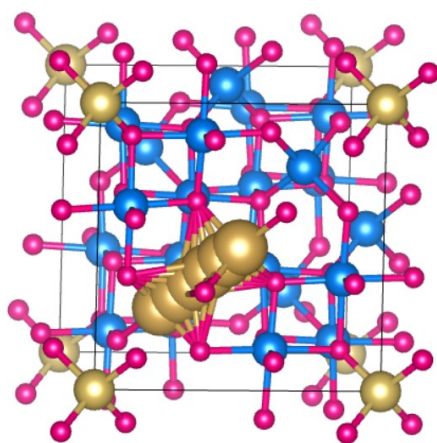

Figure S10. Migration path of Al<sup>3+</sup> in Co<sub>3</sub>O<sub>4</sub>.

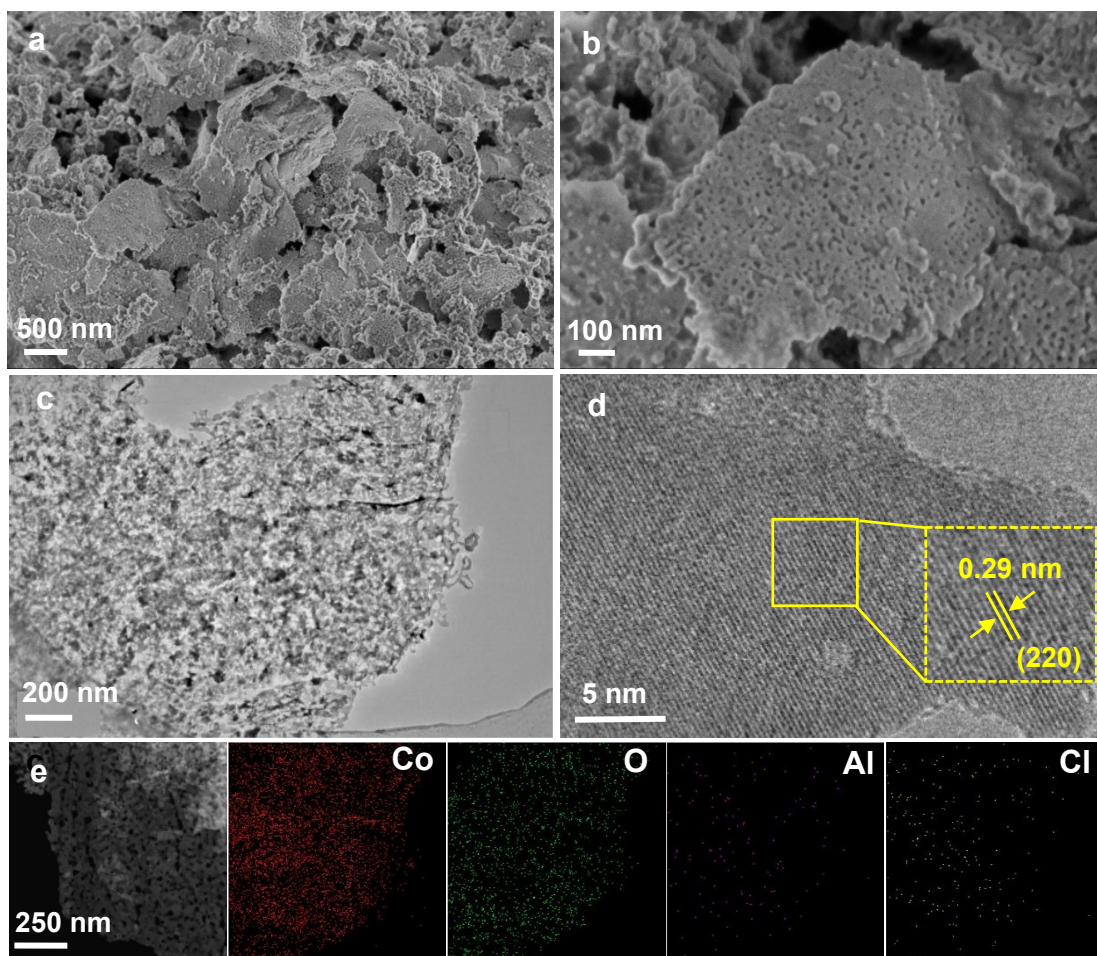

Figure S11. The microstructure of  $\text{Co}_3\text{O}_{4-x}$  cathode after 200 cycles. (a,b) SEM, (c) TEM, and (d) HRTEM images. (e) STEM-EDX elemental mapping images.

Table S1. Comparative electrochemical performance of  $\gamma$ -s  $\text{Fe}_{0.4}\text{Co}_{0.6}\text{S@NC}$  with other cathode materials recently reported.

| Cathode materials                                  | Current Density<br>( $\text{A g}^{-1}$ ) | Cycle Number | Capacity (After Cycling)<br>( $\text{mAh g}^{-1}$ ) |
|----------------------------------------------------|------------------------------------------|--------------|-----------------------------------------------------|
| This work                                          | 1                                        | 1800         | 104.2                                               |
| $\text{WO}_{3-x}$ <sup>1</sup>                     | 0.1                                      | 100          | ~85                                                 |
| $\text{CuO}$ <sup>2</sup>                          | 0.2                                      | 100          | 112.65                                              |
| $\text{Co}_3\text{O}_4$ <sup>3</sup>               | 0.2                                      | 200          | 122.1                                               |
| $\text{Co}_3\text{O}_4\text{@MWCNTs}$ <sup>4</sup> | 0.1                                      | 150          | 125                                                 |
| $\text{Nb}_2\text{O}_5$ <sup>5</sup>               | 0.1                                      | 110          | 113                                                 |
| $\text{TiO}_2$ <sup>6</sup>                        | 0.05                                     | 50           | ~37                                                 |
| $\text{V}_2\text{O}_5$ <sup>7</sup>                | 2                                        | 50           | ~60                                                 |
| $\delta\text{-MnO}_2$ <sup>8</sup>                 | 0.05                                     | 140          | ~34                                                 |
| $\text{TeO}_2$ <sup>9</sup>                        | 0.5                                      | 700          | 91.1                                                |
| $\text{h-MoO}_3$ <sup>10</sup>                     | 0.1                                      | 100          | ~100                                                |

- 1 J. Tu, H. Lei, Z. Yu and S. Jiao, *Chem. Commun.*, 2018, **54**, 1343-1346.
- 2 X. Zhang, G. Zhang, S. Wang, S. Li and S. Jiao, *J. Mater. Chem. A*, 2018, **6**, 3084-3090.
- 3 J. Liu, Z. Li, X. Huo and J. Li, *J. Power Sources*, 2019, **422**, 49-56.
- 4 C. Li, S. Dong, P. Wang, C. Wang and L. Yin, *Adv. Energy Mater.*, 2019, **9**, 1902352.
- 5 L. Wang, H. Lin, W. Kong, Y. Hu, R. Chen, P. Zhao, M. Shokouhimehr, X. L. Zhang, Z. Tie and Z. Jin, *Nanoscale*, 2020, **12**, 12531-12540.
- 6 N. Zhu, F. Wu, Z. Wang, L. Ling, H. Yang, Y. Gao, S. Guo, I. Suo, H. Li, H. Xu, Y. Bai and C. Wu, *J. Energy Chem.*, 2020, **51**, 72-80.
- 7 A. M. Diem, J. Bill and Z. Burghard, *ACS Appl. Energy Mater.*, 2020, **3**, 4033-4042.
- 8 P. Almodóvar, D. A. Giraldo, J. Chancón, I. Álvarez-Serrano and M. L. López, *ChemElectroChem*, 2020, **7**, 2102-2106.
- 9 J. Tu, M. Wang, Y. Luo and S. Jiao, *ACS Sustain. Chem. Eng.*, 2020, **8**, 2416-2422.
- 10 P. Almodóvar, D. Giraldo, C. Díaz-Guerra, J. Ramírez-Castellanos, J. M. González Calbet, J. Chacón and M. L. López, *J. Power Sources*, 2021, **516**, 230656.
